# Supplementary material
Source: PubMed Central journal article supplement (PMC8721076)
Supplement: mmc2.pdf [file mmc2.pdf]

**Supplementary File 1: Risk of Bias Assessments (A) and distribution (B) of included studies**

A

|                      | Random sequence generation (selection bias) | Allocation concealment (selection bias) | Blinding of participants and personnel (performance bias) | Blinding of outcome assessment (detection bias) | Incomplete outcome data (attrition bias) | Selective reporting (reporting bias) | Other bias |
|----------------------|---------------------------------------------|-----------------------------------------|-----------------------------------------------------------|-------------------------------------------------|------------------------------------------|--------------------------------------|------------|
| Külcü, 2009          | -                                           | ?                                       | -                                                         | -                                               | +                                        | ?                                    | -          |
| Loyola-Sánchez, 2012 | +                                           | +                                       | +                                                         | +                                               | +                                        | +                                    | -          |
| Özgönenel, 2009      | ?                                           | ?                                       | +                                                         | +                                               | -                                        | +                                    | ?          |
| Tascioglu, 2010      | ?                                           | +                                       | +                                                         | +                                               | ?                                        | +                                    | ?          |
| Yegin, 2017          | ?                                           | ?                                       | +                                                         | ?                                               | +                                        | -                                    | ?          |

B

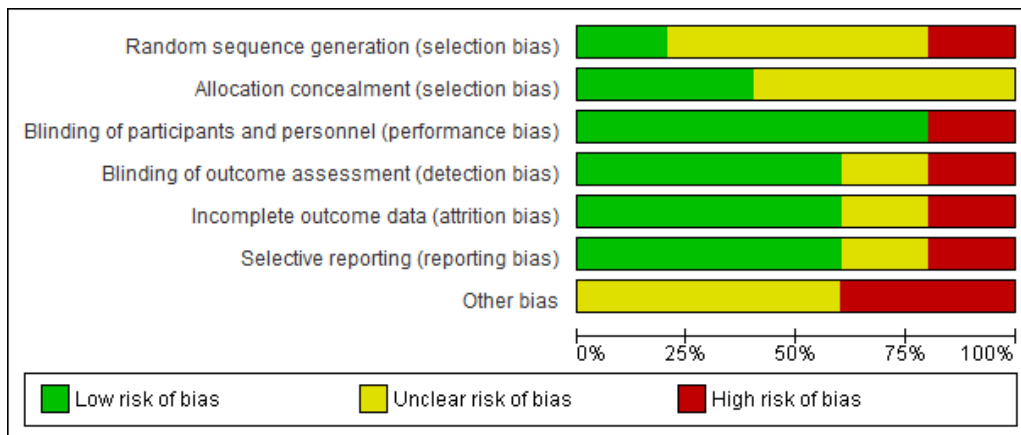

**Supplementary File 2:** Systematic Search Strategy for MEDLINE; executed 5/7/2019

|                                                                                            |
|--------------------------------------------------------------------------------------------|
| 1. exp osteoarthritis/ or exp osteoarthritis, knee/ or exp osteoarthritis, hip/            |
| 2. gonarthrosis.mp.                                                                        |
| 3. coxarthrosis.mp.                                                                        |
| 4. osteoart\$.mp. [mp=ti, ab, ot, nm, hw, fx, kf, ox, px, rx, ui, sy, sh, kw]              |
| 5. exp randomized controlled trials/                                                       |
| 6. exp random allocation/                                                                  |
| 7. exp double-blind method/                                                                |
| 8. exp single-blind method/                                                                |
| 9. exp cross over studies/                                                                 |
| 10. exp clinical trial/                                                                    |
| 11. randomized controlled trial.pt.                                                        |
| 12. controlled clinical trial.pt.                                                          |
| 13. (random\$ or rct).tw.                                                                  |
| 14. (clin\$ adj25 trial\$).tw.                                                             |
| 15. clinical trial.pt.                                                                     |
| 16. multicenter study.pt.                                                                  |
| 17. ((singl\$ or doubl\$ or trebl\$ or tripl\$) adj (blind\$ or mask\$)).tw.               |
| 18. exp Comparative Study/                                                                 |
| 19. arthroscop\$.ti.                                                                       |
| 20. arthroscop\$.ab.                                                                       |
| 21. arthroscop\$.hw.                                                                       |
| 22. arthroplasty.ti.                                                                       |
| 23. arthroplasty.ab.                                                                       |
| 24. arthroplasty.hw.                                                                       |
| 25. protocol.ti.                                                                           |
| 26. protocol.ab.                                                                           |
| 27. therapeutic ultrasound.mp. [mp=ti, ab, ot, nm, hw, fx, kf, ox, px, rx, ui, sy, sh, kw] |
| 28. ultrasound.mp. [mp=ti, ab, ot, nm, hw, fx, kf, ox, px, rx, ui, sy, sh, kw]             |
| 29. diagnos\$.mp. [mp=ti, ab, ot, nm, hw, fx, kf, ox, px, rx, ui, sy, sh, kw]              |
| 30. 1 or 2 or 3 or 4                                                                       |
| 31. 5 or 6 or 7 or 8 or 9 or 10 or 11 or 12 or 13 or 14 or 15 or 16 or 17 or 18            |
| 32. 28 not 29                                                                              |
| 33. 27 or 32                                                                               |
| 34. 19 or 20 or 21                                                                         |
| 35. 22 or 23 or 24                                                                         |
| 36. 25 or 26                                                                               |
| 37. 30 and 31 and 33                                                                       |
| 38. 37 not 34                                                                              |
| 39. 38 not 35                                                                              |
| 40. 39 not 36                                                                              |
| 41. Limit 40 to humans                                                                     |
| 42. Remove duplicates from 41                                                              |
